# Supplementary material for: Examination of intermolecular electronic interactions in the crystal structure of C60(CF3)12 by experimental electron density determination
Source: Royal Society of Chemistry journal article supplement (doi:10.1039/b712694h), 2007-01-01
Supplement: b712694h.pdf [file b712694h.pdf]

## Supplementary Material for the article:

### Examination of intermolecular electronic interactions in the crystal structure of $C_{60}(CF_3)_{12}$ by experimental electron density determination

**Authors:** Lilianna Chęcińska, Sergey I. Troyanov, Stefan Mebs, Christian B. Hübschle and Peter Luger

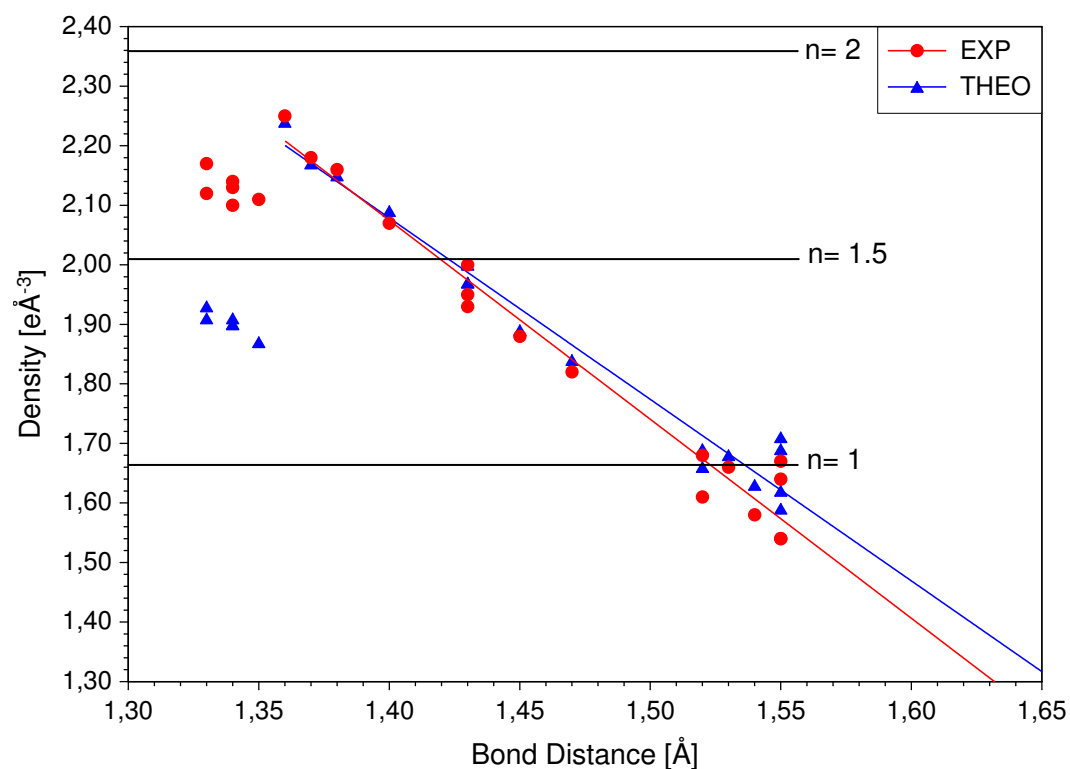

**Figure sup\_1:** Plot of  $\rho(r_{BCP})$  values [eÅ<sup>-3</sup>] versus bond length [Å] for the C-C bonds in the title compound from experiment and theory (single point: B3LYP/6-311++G(3df,3pd)). The data for the C-F bonds are also shown as a small cluster at a bond length around 1.34 Å.

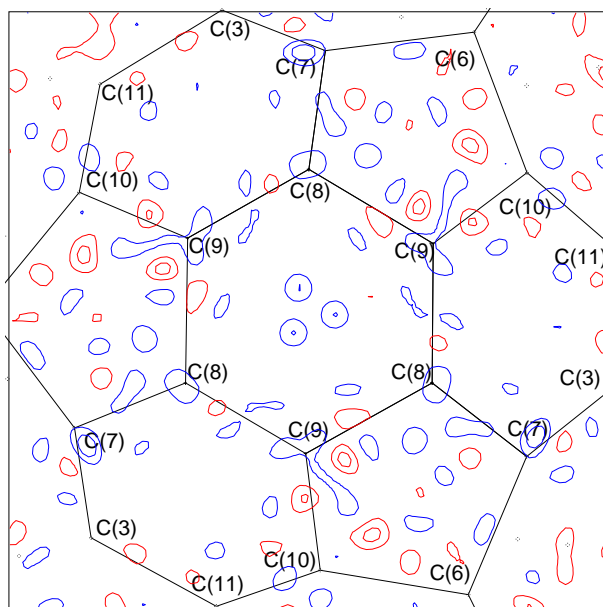

**Figure sup\_2:** Residual density in the plane of the six membered ring. Blue/red: positive/negative regions. Contour interval 0.1 [ $e\text{\AA}^{-3}$ ]. Adjacent atoms shown for illustration.

**Table sup\_1:** Multipole population coefficients

| atom  | $P_v$    | $P_{00}$ | $P_{11}$  | $P_{1-1}$ | $P_{10}$  |
|-------|----------|----------|-----------|-----------|-----------|
| F(1)  | 7.04( 2) | 0.00( 0) | 0.00( 0)  | 0.00( 0)  | -0.04( 1) |
| F(2)  | 7.08( 2) | 0.00( 0) | 0.00( 0)  | 0.00( 0)  | -0.01( 1) |
| F(3)  | 7.04( 2) | 0.00( 0) | 0.00( 0)  | 0.00( 0)  | -0.05( 1) |
| F(4)  | 7.00( 2) | 0.00( 0) | 0.00( 0)  | 0.00( 0)  | -0.04( 1) |
| F(5)  | 7.03( 2) | 0.00( 0) | 0.00( 0)  | 0.00( 0)  | -0.02( 1) |
| F(6)  | 6.99( 2) | 0.00( 0) | 0.00( 0)  | 0.00( 0)  | -0.04( 1) |
| C(1)  | 4.01( 4) | 0.00( 0) | 0.00( 0)  | 0.00( 0)  | 0.07( 1)  |
| C(2)  | 4.04( 4) | 0.00( 0) | 0.00( 0)  | 0.00( 0)  | 0.08( 1)  |
| C(3)  | 4.00( 3) | 0.00( 0) | -0.05( 1) | 0.03( 1)  | -0.02( 1) |
| C(4)  | 3.94( 4) | 0.00( 0) | -0.06( 1) | 0.00( 1)  | 0.05( 1)  |
| C(5)  | 4.03( 3) | 0.00( 0) | -0.07( 1) | -0.07( 1) | -0.04( 1) |
| C(6)  | 3.79( 4) | 0.00( 0) | 0.04( 1)  | 0.04( 1)  | 0.05( 1)  |
| C(7)  | 4.05( 3) | 0.00( 0) | -0.06( 1) | -0.04( 1) | 0.00( 1)  |
| C(8)  | 3.95( 3) | 0.00( 0) | -0.07( 1) | 0.00( 1)  | 0.00( 1)  |
| C(9)  | 3.97( 3) | 0.00( 0) | -0.06( 1) | 0.00( 1)  | 0.02( 1)  |
| C(10) | 3.99( 3) | 0.00( 0) | 0.05( 1)  | 0.01( 1)  | 0.03( 1)  |
| C(11) | 4.04( 3) | 0.00( 0) | -0.07( 1) | 0.03( 1)  | 0.00( 1)  |
| C(12) | 4.01( 3) | 0.00( 0) | -0.04( 1) | -0.03( 1) | 0.00( 1)  |

| atom  | $P_{20}$  | $P_{21}$  | $P_{2-1}$ | $P_{22}$  | $P_{2-2}$ |
|-------|-----------|-----------|-----------|-----------|-----------|
| F(1)  | -0.06( 1) | 0.00( 0)  | 0.00( 0)  | 0.00( 0)  | 0.00( 0)  |
| F(2)  | -0.08( 1) | 0.00( 0)  | 0.00( 0)  | 0.00( 0)  | 0.00( 0)  |
| F(3)  | -0.11( 1) | 0.00( 0)  | 0.00( 0)  | 0.00( 0)  | 0.00( 0)  |
| F(4)  | -0.06( 1) | 0.00( 0)  | 0.00( 0)  | 0.00( 0)  | 0.00( 0)  |
| F(5)  | -0.10( 1) | 0.00( 0)  | 0.00( 0)  | 0.00( 0)  | 0.00( 0)  |
| F(6)  | -0.11( 1) | 0.00( 0)  | 0.00( 0)  | 0.00( 0)  | 0.00( 0)  |
| C(1)  | 0.07( 1)  | 0.00( 0)  | 0.00( 0)  | 0.00( 0)  | 0.00( 0)  |
| C(2)  | 0.05( 1)  | 0.00( 0)  | 0.00( 0)  | 0.00( 0)  | 0.00( 0)  |
| C(3)  | 0.05( 1)  | 0.01( 1)  | -0.03( 1) | -0.03( 1) | 0.15( 1)  |
| C(4)  | 0.01( 1)  | 0.02( 1)  | -0.01( 1) | 0.01( 1)  | 0.03( 1)  |
| C(5)  | 0.08( 1)  | 0.05( 1)  | 0.05( 1)  | -0.09( 1) | 0.07( 1)  |
| C(6)  | 0.01( 1)  | 0.00( 1)  | -0.02( 1) | -0.01( 1) | -0.02( 1) |
| C(7)  | 0.10( 1)  | 0.07( 1)  | 0.03( 1)  | -0.10( 1) | 0.08( 1)  |
| C(8)  | 0.06( 1)  | 0.08( 1)  | 0.00( 1)  | -0.11( 1) | 0.07( 1)  |
| C(9)  | 0.07( 1)  | 0.04( 1)  | 0.02( 1)  | -0.11( 1) | 0.07( 1)  |
| C(10) | 0.11( 1)  | -0.01( 1) | -0.04( 1) | -0.09( 1) | -0.05( 1) |
| C(11) | 0.09( 1)  | 0.05( 1)  | -0.06( 1) | -0.12( 1) | 0.07( 1)  |
| C(12) | 0.07( 1)  | 0.03( 1)  | 0.02( 1)  | -0.14( 1) | 0.08( 1)  |

| atom  | $P_{30}$ | $P_{31}$  | $P_{3-1}$ | $P_{32}$ | $P_{3-2}$ | $P_{33}$  | $P_{3-3}$ |
|-------|----------|-----------|-----------|----------|-----------|-----------|-----------|
| F(1)  | 0.02( 1) | 0.00( 0)  | 0.00( 0)  | 0.00( 0) | 0.00( 0)  | 0.00( 0)  | 0.00( 0)  |
| F(2)  | 0.01( 1) | 0.00( 0)  | 0.00( 0)  | 0.00( 0) | 0.00( 0)  | 0.00( 0)  | 0.00( 0)  |
| F(3)  | 0.00( 1) | 0.00( 0)  | 0.00( 0)  | 0.00( 0) | 0.00( 0)  | 0.00( 0)  | 0.00( 0)  |
| F(4)  | 0.01( 1) | 0.00( 0)  | 0.00( 0)  | 0.00( 0) | 0.00( 0)  | 0.00( 0)  | 0.00( 0)  |
| F(5)  | 0.00( 1) | 0.00( 0)  | 0.00( 0)  | 0.00( 0) | 0.00( 0)  | 0.00( 0)  | 0.00( 0)  |
| F(6)  | 0.03( 1) | 0.00( 0)  | 0.00( 0)  | 0.00( 0) | 0.00( 0)  | 0.00( 0)  | 0.00( 0)  |
| C(1)  | 0.34( 1) | 0.00( 0)  | 0.00( 0)  | 0.00( 0) | 0.00( 0)  | 0.00( 1)  | -0.26( 1) |
| C(2)  | 0.36( 1) | 0.00( 0)  | 0.00( 0)  | 0.00( 0) | 0.00( 0)  | -0.03( 1) | -0.26( 1) |
| C(3)  | 0.16( 1) | 0.04( 1)  | 0.03( 1)  | 0.02( 1) | -0.09( 1) | 0.03( 1)  | -0.04( 1) |
| C(4)  | 0.20( 1) | 0.04( 1)  | 0.02( 1)  | 0.01( 1) | 0.00( 1)  | -0.04( 1) | -0.17( 1) |
| C(5)  | 0.19( 1) | 0.02( 1)  | 0.00( 1)  | 0.09( 1) | -0.06( 1) | 0.00( 1)  | -0.05( 1) |
| C(6)  | 0.21( 1) | -0.06( 1) | 0.02( 1)  | 0.02( 1) | -0.02( 1) | 0.05( 1)  | -0.14( 1) |
| C(7)  | 0.20( 1) | 0.04( 1)  | -0.03( 1) | 0.11( 1) | -0.07( 1) | 0.00( 1)  | -0.05( 1) |
| C(8)  | 0.17( 1) | 0.02( 1)  | -0.05( 1) | 0.09( 1) | -0.04( 1) | 0.04( 1)  | -0.06( 1) |
| C(9)  | 0.19( 1) | 0.00( 1)  | -0.06( 1) | 0.14( 1) | -0.09( 1) | 0.01( 1)  | -0.07( 1) |
| C(10) | 0.16( 1) | 0.00( 1)  | -0.03( 1) | 0.13( 1) | 0.11( 1)  | -0.06( 1) | -0.02( 1) |
| C(11) | 0.17( 1) | 0.04( 1)  | 0.04( 1)  | 0.10( 1) | -0.08( 1) | 0.03( 1)  | -0.03( 1) |
| C(12) | 0.23( 1) | 0.04( 1)  | -0.01( 1) | 0.08( 1) | -0.05( 1) | 0.00( 1)  | -0.05( 1) |

| atom  | $P_{40}$  | $P_{41}$  | $P_{4-1}$ | $P_{42}$  | $P_{4-2}$ | $P_{43}$  | $P_{4-3}$ | $P_{44}$  | $P_{4-4}$ |
|-------|-----------|-----------|-----------|-----------|-----------|-----------|-----------|-----------|-----------|
| F(1)  | 0.01( 1)  | 0.00( 0)  | 0.00( 0)  | 0.00( 0)  | 0.00( 0)  | 0.00( 0)  | 0.00( 0)  | 0.00( 0)  | 0.00( 0)  |
| F(2)  | 0.00( 1)  | 0.00( 0)  | 0.00( 0)  | 0.00( 0)  | 0.00( 0)  | 0.00( 0)  | 0.00( 0)  | 0.00( 0)  | 0.00( 0)  |
| F(3)  | 0.02( 1)  | 0.00( 0)  | 0.00( 0)  | 0.00( 0)  | 0.00( 0)  | 0.00( 0)  | 0.00( 0)  | 0.00( 0)  | 0.00( 0)  |
| F(4)  | -0.01( 1) | 0.00( 0)  | 0.00( 0)  | 0.00( 0)  | 0.00( 0)  | 0.00( 0)  | 0.00( 0)  | 0.00( 0)  | 0.00( 0)  |
| F(5)  | 0.00( 1)  | 0.00( 0)  | 0.00( 0)  | 0.00( 0)  | 0.00( 0)  | 0.00( 0)  | 0.00( 0)  | 0.00( 0)  | 0.00( 0)  |
| F(6)  | 0.02( 1)  | 0.00( 0)  | 0.00( 0)  | 0.00( 0)  | 0.00( 0)  | 0.00( 0)  | 0.00( 0)  | 0.00( 0)  | 0.00( 0)  |
| C(1)  | 0.03( 1)  | 0.00( 0)  | 0.00( 0)  | 0.00( 0)  | 0.00( 0)  | 0.03( 1)  | 0.15( 1)  | 0.00( 0)  | 0.00( 0)  |
| C(2)  | 0.08( 1)  | 0.00( 0)  | 0.00( 0)  | 0.00( 0)  | 0.00( 0)  | 0.05( 1)  | 0.17( 1)  | 0.00( 0)  | 0.00( 0)  |
| C(3)  | 0.01( 2)  | -0.01( 1) | 0.00( 2)  | -0.02( 2) | -0.01( 2) | -0.01( 1) | 0.01( 1)  | 0.01( 1)  | -0.03( 1) |
| C(4)  | 0.05( 2)  | 0.00( 1)  | -0.01( 1) | -0.03( 1) | 0.01( 1)  | -0.01( 1) | 0.04( 1)  | -0.02( 1) | 0.01( 1)  |
| C(5)  | -0.01( 2) | -0.03( 1) | 0.00( 2)  | 0.01( 2)  | 0.00( 2)  | -0.01( 1) | 0.02( 1)  | 0.00( 1)  | 0.02( 1)  |
| C(6)  | 0.01( 2)  | -0.01( 1) | 0.01( 1)  | -0.03( 1) | 0.03( 1)  | 0.02( 1)  | 0.03( 1)  | 0.00( 1)  | -0.01( 1) |
| C(7)  | 0.03( 2)  | -0.03( 1) | -0.01( 2) | -0.01( 2) | 0.00( 2)  | -0.02( 1) | 0.03( 1)  | -0.01( 1) | 0.01( 1)  |
| C(8)  | 0.03( 2)  | 0.01( 2)  | 0.00( 2)  | 0.00( 2)  | -0.01( 2) | 0.01( 2)  | 0.01( 1)  | -0.01( 1) | 0.01( 1)  |
| C(9)  | 0.04( 2)  | -0.01( 1) | 0.00( 2)  | -0.01( 2) | 0.01( 2)  | 0.00( 2)  | 0.02( 1)  | 0.02( 1)  | 0.01( 1)  |
| C(10) | -0.01( 2) | 0.01( 1)  | 0.01( 2)  | -0.01( 2) | 0.00( 2)  | 0.03( 1)  | 0.04( 1)  | 0.01( 1)  | 0.01( 1)  |
| C(11) | 0.04( 2)  | -0.02( 1) | -0.02( 2) | -0.02( 2) | 0.01( 2)  | -0.04( 1) | 0.02( 1)  | 0.00( 1)  | 0.01( 1)  |
| C(12) | 0.03( 2)  | 0.02( 1)  | -0.01( 2) | -0.01( 2) | -0.02( 2) | 0.02( 1)  | -0.01( 1) | 0.01( 1)  | -0.01( 1) |

**Table sup\_2:** List of atomic properties

| Atom       | Group | $V_{tot}[\text{\AA}^3]$ | $V_{001}[\text{\AA}^3]$ | Q[e]  |
|------------|-------|-------------------------|-------------------------|-------|
| F(1)       | D     | 15.16                   | 14.45                   | -0.62 |
| F(2)       | D     | 15.51                   | 14.07                   | -0.65 |
| F(3)       | D     | 16.94                   | 15.06                   | -0.59 |
| F(4)       | D     | 18.23                   | 15.17                   | -0.56 |
| F(5)       | D     | 15.24                   | 14.42                   | -0.61 |
| F(6)       | D     | 17.15                   | 14.78                   | -0.59 |
| C(1)       | C     | 3.20                    | 3.20                    | 1.70  |
| C(2)       | C     | 3.28                    | 3.28                    | 1.68  |
| C(3)       | A     | 11.08                   | 9.66                    | -0.01 |
| C(4)       | B     | 6.48                    | 6.45                    | 0.04  |
| C(5)       | A     | 9.65                    | 9.42                    | -0.02 |
| C(6)       | B     | 6.35                    | 6.35                    | 0.19  |
| C(7)       | A     | 11.05                   | 9.93                    | -0.04 |
| C(8)       | A     | 10.05                   | 9.82                    | 0.04  |
| C(9)       | A     | 10.10                   | 9.84                    | 0.06  |
| C(10)      | A     | 10.52                   | 9.89                    | 0.01  |
| C(11)      | A     | 10.76                   | 10.19                   | -0.01 |
| C(12)      | A     | 9.94                    | 9.60                    | -0.00 |
| sum        |       | 200.68                  |                         | 0.02* |
| x18        |       | 3612.2*                 |                         |       |
| $V_{cell}$ |       | 3617.3                  |                         |       |

\*Bader atomic volumes and charges are additive. The sum of atomic volumes in a given unit cell should be equal to the experimental cell volume. Similarly the sum of all atomic charges should add up to zero. For the title compound the sum of  $V_{tot}$  reproduces the unit cell volume within less than 1%, whereas the charges add up to 0.02 e, being indications that the integration procedure for atomic properties has worked properly.
